# Supplementary material
Source: PubMed Central journal article supplement (PMC10234430)
Supplement: NIHMS1893235-supplement-Supplementary_Table_1.pdf [file NIHMS1893235-supplement-Supplementary_Table_1.pdf]

| <b>Supplementary Table 1. Adverse events with maximum grade seen</b> |                                                      |                   |    |   |   |       |
|----------------------------------------------------------------------|------------------------------------------------------|-------------------|----|---|---|-------|
| Adverse Event                                                        |                                                      | Grade             |    |   |   | Total |
|                                                                      |                                                      | 1                 | 2  | 3 | 4 |       |
| Blood and lymphatic system disorders                                 | Any Adverse Event                                    | 1                 | 1  | 0 | 0 | 2     |
|                                                                      | Anemia                                               | 1                 | 0  | 0 | 0 | 1     |
|                                                                      | Lymphopenia                                          | 1                 | 1  | 0 | 0 | 2     |
| Endocrine disorders                                                  | Any Adverse Event                                    | 2                 | 2  | 0 | 0 | 4     |
|                                                                      | Hyperthyroidism                                      | 1                 | 0  | 0 | 0 | 1     |
|                                                                      | Hypothyroidism                                       | 1                 | 2  | 0 | 0 | 3     |
| Eye disorders                                                        | Any Adverse Event                                    | 3                 | 0  | 0 | 0 | 3     |
|                                                                      | Eye pruritus                                         | 1                 | 0  | 0 | 0 | 1     |
|                                                                      | Papilledema                                          | 1                 | 0  | 0 | 0 | 1     |
|                                                                      | Vision blurred                                       | 2                 | 0  | 0 | 0 | 2     |
|                                                                      | Visual impairment                                    | 1                 | 0  | 0 | 0 | 1     |
| Gastrointestinal disorders                                           | Any Adverse Event                                    | 24                | 6  | 1 | 0 | 31    |
|                                                                      | Abdominal pain                                       | 0                 | 1  | 0 | 0 | 1     |
|                                                                      | Constipation                                         | 9                 | 0  | 0 | 0 | 9     |
|                                                                      | Diarrhea                                             | 11                | 2  | 0 | 0 | 13    |
|                                                                      | Dry mouth                                            | 4                 | 0  | 0 | 0 | 4     |
|                                                                      | Dyspepsia                                            | 2                 | 0  | 0 | 0 | 2     |
|                                                                      | Lip dry                                              | 1                 | 0  | 0 | 0 | 1     |
|                                                                      | Mouth ulceration                                     | 1                 | 0  | 0 | 0 | 1     |
|                                                                      | Nausea                                               | 8                 | 1  | 0 | 0 | 9     |
|                                                                      | Oral pain                                            | 2                 | 0  | 0 | 0 | 2     |
|                                                                      | Pancreatitis                                         | 0                 | 0  | 1 | 0 | 1     |
|                                                                      | Salivary duct inflammation                           | 1                 | 0  | 0 | 0 | 1     |
|                                                                      | Stomatitis                                           | 5                 | 2  | 0 | 0 | 7     |
|                                                                      | Vomiting                                             | 7                 | 0  | 0 | 0 | 7     |
|                                                                      | General disorders and administration site conditions | Any Adverse Event | 22 | 5 | 0 | 0     |
| Chills                                                               |                                                      | 4                 | 1  | 0 | 0 | 5     |
| Facial pain                                                          |                                                      | 1                 | 0  | 0 | 0 | 1     |
| Fatigue                                                              |                                                      | 14                | 3  | 0 | 0 | 17    |
| Influenza like illness                                               |                                                      | 1                 | 0  | 0 | 0 | 1     |
| Infusion site reaction                                               |                                                      | 1                 | 0  | 0 | 0 | 1     |
| Mucosal inflammation                                                 |                                                      | 2                 | 0  | 0 | 0 | 2     |
| Edema peripheral                                                     |                                                      | 3                 | 0  | 0 | 0 | 3     |
| Pain                                                                 |                                                      | 1                 | 0  | 0 | 0 | 1     |
| Pyrexia                                                              |                                                      | 5                 | 1  | 0 | 0 | 6     |
| Tenderness                                                           |                                                      | 1                 | 0  | 0 | 0 | 1     |
| Infections and infestations                                          | Any Adverse Event                                    | 1                 | 3  | 0 | 0 | 4     |
|                                                                      | Candida infection                                    | 0                 | 1  | 0 | 0 | 1     |
|                                                                      | Infection                                            | 1                 | 0  | 0 | 0 | 1     |
|                                                                      | Paronychia                                           | 0                 | 2  | 0 | 0 | 2     |
|                                                                      | Rash pustular                                        | 1                 | 0  | 0 | 0 | 1     |
| Injury, poisoning and procedural complications                       | Any Adverse Event                                    | 2                 | 7  | 1 | 0 | 10    |

|                                                 |                                    |                   |    |   |   |    |
|-------------------------------------------------|------------------------------------|-------------------|----|---|---|----|
|                                                 | Infusion related reaction          | 1                 | 7  | 1 | 0 | 9  |
|                                                 | Sunburn                            | 1                 | 0  | 0 | 0 | 1  |
| Investigations                                  | Any Adverse Event                  | 3                 | 2  | 4 | 0 | 9  |
|                                                 | ALT Elevation                      | 1                 | 2  | 0 | 0 | 3  |
|                                                 | AST Elevation                      | 2                 | 1  | 1 | 0 | 4  |
|                                                 | ALP                                | 0                 | 0  | 1 | 0 | 1  |
|                                                 | ALP elevation                      | 2                 | 0  | 1 | 0 | 3  |
|                                                 | Creatinine increased               | 0                 | 1  | 0 | 0 | 1  |
|                                                 | Magnesium decreased                | 1                 | 0  | 0 | 0 | 1  |
|                                                 | Lymphocyte decreased               | 1                 | 0  | 0 | 0 | 1  |
|                                                 | Transaminases increased            | 0                 | 0  | 1 | 0 | 1  |
|                                                 | Metabolism and nutrition disorders | Any Adverse Event | 11 | 7 | 3 | 1  |
| Anorexia                                        |                                    | 9                 | 1  | 0 | 0 | 10 |
| Hypermagnesemia                                 |                                    | 1                 | 0  | 0 | 0 | 1  |
| Hypocalcemia                                    |                                    | 2                 | 0  | 1 | 0 | 3  |
| Hypokalemia                                     |                                    | 2                 | 2  | 0 | 0 | 4  |
| Hypomagnesemia                                  |                                    | 7                 | 5  | 3 | 1 | 16 |
| Hyponatremia                                    |                                    | 1                 | 0  | 0 | 0 | 1  |
| Musculoskeletal and connective tissue disorders | Any Adverse Event                  | 3                 | 5  | 0 | 0 | 8  |
|                                                 | Arthralgia                         | 1                 | 3  | 0 | 0 | 4  |
|                                                 | Back pain                          | 1                 | 1  | 0 | 0 | 2  |
|                                                 | Muscle spasms                      | 1                 | 1  | 0 | 0 | 2  |
|                                                 | Muscular weakness                  | 1                 | 0  | 0 | 0 | 1  |
|                                                 | Myalgia                            | 1                 | 0  | 0 | 0 | 1  |
|                                                 | Pain in extremity                  | 2                 | 0  | 0 | 0 | 2  |
| Nervous system disorders                        | Any Adverse Event                  | 11                | 3  | 1 | 0 | 15 |
|                                                 | Dizziness                          | 2                 | 0  | 0 | 0 | 2  |
|                                                 | Drooling                           | 1                 | 0  | 0 | 0 | 1  |
|                                                 | Headache                           | 4                 | 2  | 1 | 0 | 7  |
|                                                 | Hyperesthesia                      | 1                 | 0  | 0 | 0 | 1  |
|                                                 | Neuropathy peripheral              | 1                 | 0  | 0 | 0 | 1  |
|                                                 | Sciatica                           | 0                 | 1  | 0 | 0 | 1  |
|                                                 | Taste disorder                     | 3                 | 0  | 0 | 0 | 3  |
| Psychiatric disorders                           | Any Adverse Event                  | 2                 | 0  | 0 | 0 | 2  |
|                                                 | Insomnia                           | 2                 | 0  | 0 | 0 | 2  |
| Renal and urinary disorders                     | Any Adverse Event                  | 0                 | 1  | 0 | 0 | 1  |
|                                                 | Urinary retention                  | 0                 | 1  | 0 | 0 | 1  |
| Respiratory, thoracic and mediastinal disorders | Any Adverse Event                  | 9                 | 4  | 0 | 0 | 13 |
|                                                 | Cough                              | 5                 | 3  | 0 | 0 | 8  |
|                                                 | Dyspnea                            | 5                 | 2  | 0 | 0 | 8  |
|                                                 | Nasal dryness                      | 1                 | 0  | 0 | 0 | 1  |
|                                                 | Paranasal sinus discomfort         | 1                 | 0  | 0 | 0 | 1  |
|                                                 | Pneumonitis                        | 0                 | 1  | 0 | 0 | 1  |
|                                                 | Productive cough                   | 1                 | 0  | 0 | 0 | 1  |
|                                                 | Rhinitis allergic                  | 1                 | 0  | 0 | 0 | 1  |
| Skin and subcutaneous tissue disorders          | Any Adverse Event                  | 23                | 12 | 4 | 0 | 39 |

|                                                                                           |                           |    |   |   |   |    |
|-------------------------------------------------------------------------------------------|---------------------------|----|---|---|---|----|
|                                                                                           | Dermatitis                | 1  | 0 | 0 | 0 | 1  |
|                                                                                           | Dermatitis acneiform      | 14 | 4 | 2 | 0 | 20 |
|                                                                                           | Dermatitis bullous        | 1  | 0 | 0 | 0 | 1  |
|                                                                                           | Drug eruption             | 1  | 0 | 0 | 0 | 1  |
|                                                                                           | Dry skin                  | 17 | 4 | 0 | 0 | 21 |
|                                                                                           | Erythema                  | 1  | 0 | 0 | 0 | 1  |
|                                                                                           | Hair growth abnormal      | 3  | 0 | 0 | 0 | 3  |
|                                                                                           | Hyperhidrosis             | 1  | 0 | 0 | 0 | 1  |
|                                                                                           | Hypertrichosis            | 1  | 0 | 0 | 0 | 1  |
|                                                                                           | Nail disorder             | 7  | 0 | 0 | 0 | 7  |
|                                                                                           | Nail growth abnormal      | 1  | 0 | 0 | 0 | 1  |
|                                                                                           | Night sweats              | 1  | 0 | 0 | 0 | 1  |
|                                                                                           | Onycholysis               | 3  | 0 | 0 | 0 | 3  |
|                                                                                           | Photosensitivity reaction | 1  | 0 | 0 | 0 | 1  |
|                                                                                           | Pruritus                  | 13 | 0 | 0 | 0 | 13 |
|                                                                                           | Rash                      | 10 | 5 | 1 | 0 | 16 |
|                                                                                           | Rash generalized          | 1  | 0 | 0 | 0 | 1  |
|                                                                                           | Rash maculo-papular       | 1  | 1 | 0 | 0 | 2  |
|                                                                                           | Skin fissures             | 2  | 1 | 0 | 0 | 3  |
|                                                                                           | Skin hyperpigmentation    | 1  | 0 | 0 | 0 | 1  |
|                                                                                           | Urticaria                 | 0  | 0 | 1 | 0 | 1  |
| Vascular disorders                                                                        | Any Adverse Event         | 3  | 1 | 0 | 0 | 4  |
|                                                                                           | Flushing                  | 1  | 0 | 0 | 0 | 1  |
|                                                                                           | Hot flush                 | 1  | 0 | 0 | 0 | 1  |
|                                                                                           | Hypertension              | 1  | 1 | 0 | 0 | 2  |
| ALT: Alanine Aminotransferase, ALP: Alkaline Phosphatase, AST: Aspartate Aminotransferase |                           |    |   |   |   |    |
