# Supplementary material
Source: PubMed Central journal article supplement (PMC10234430)
Supplement: NIHMS1893235-supplement-Supplementary_Table_3.pdf [file NIHMS1893235-supplement-Supplementary_Table_3.pdf]

**Supplementary Table 3.** T-cell infiltration for patient LH-01-26 with BRAF V600 mutation in comparison to study population

| T-cells                                                             | N  | Median | Min  | 75 <sup>th</sup><br>PCTL | 95 <sup>th</sup><br>PCTL | Max    | LH-01-26 |
|---------------------------------------------------------------------|----|--------|------|--------------------------|--------------------------|--------|----------|
| %CD3 <sup>+</sup> cells/%CD8 <sup>+</sup> cells                     | 27 | 39.28  | 0.00 | 45.61                    | 54.74                    | 62.42  | 62.42    |
| %CD3 <sup>+</sup> cells/%PD1 <sup>+</sup> CD8 <sup>+</sup> cells    | 27 | 60.75  | 0.00 | 78.74                    | 92.09                    | 100.00 | 75.65    |
| %CD8 <sup>+</sup> cells/%CD8 <sup>+</sup> CD45RO <sup>+</sup> cells | 27 | 85.83  | 0.00 | 90.73                    | 98.83                    | 100.00 | 89.79    |
| %CD8 <sup>+</sup> cells/%PD1 <sup>+</sup> CD45RO <sup>+</sup> cells | 27 | 70.00  | 0.00 | 83.95                    | 97.96                    | 100.00 | 80.47    |
| PCTL: Percentile                                                    |    |        |      |                          |                          |        |          |
