# Supplementary material
Source: PubMed Central journal article supplement (PMC10234430)

## Supplementary Figure 1

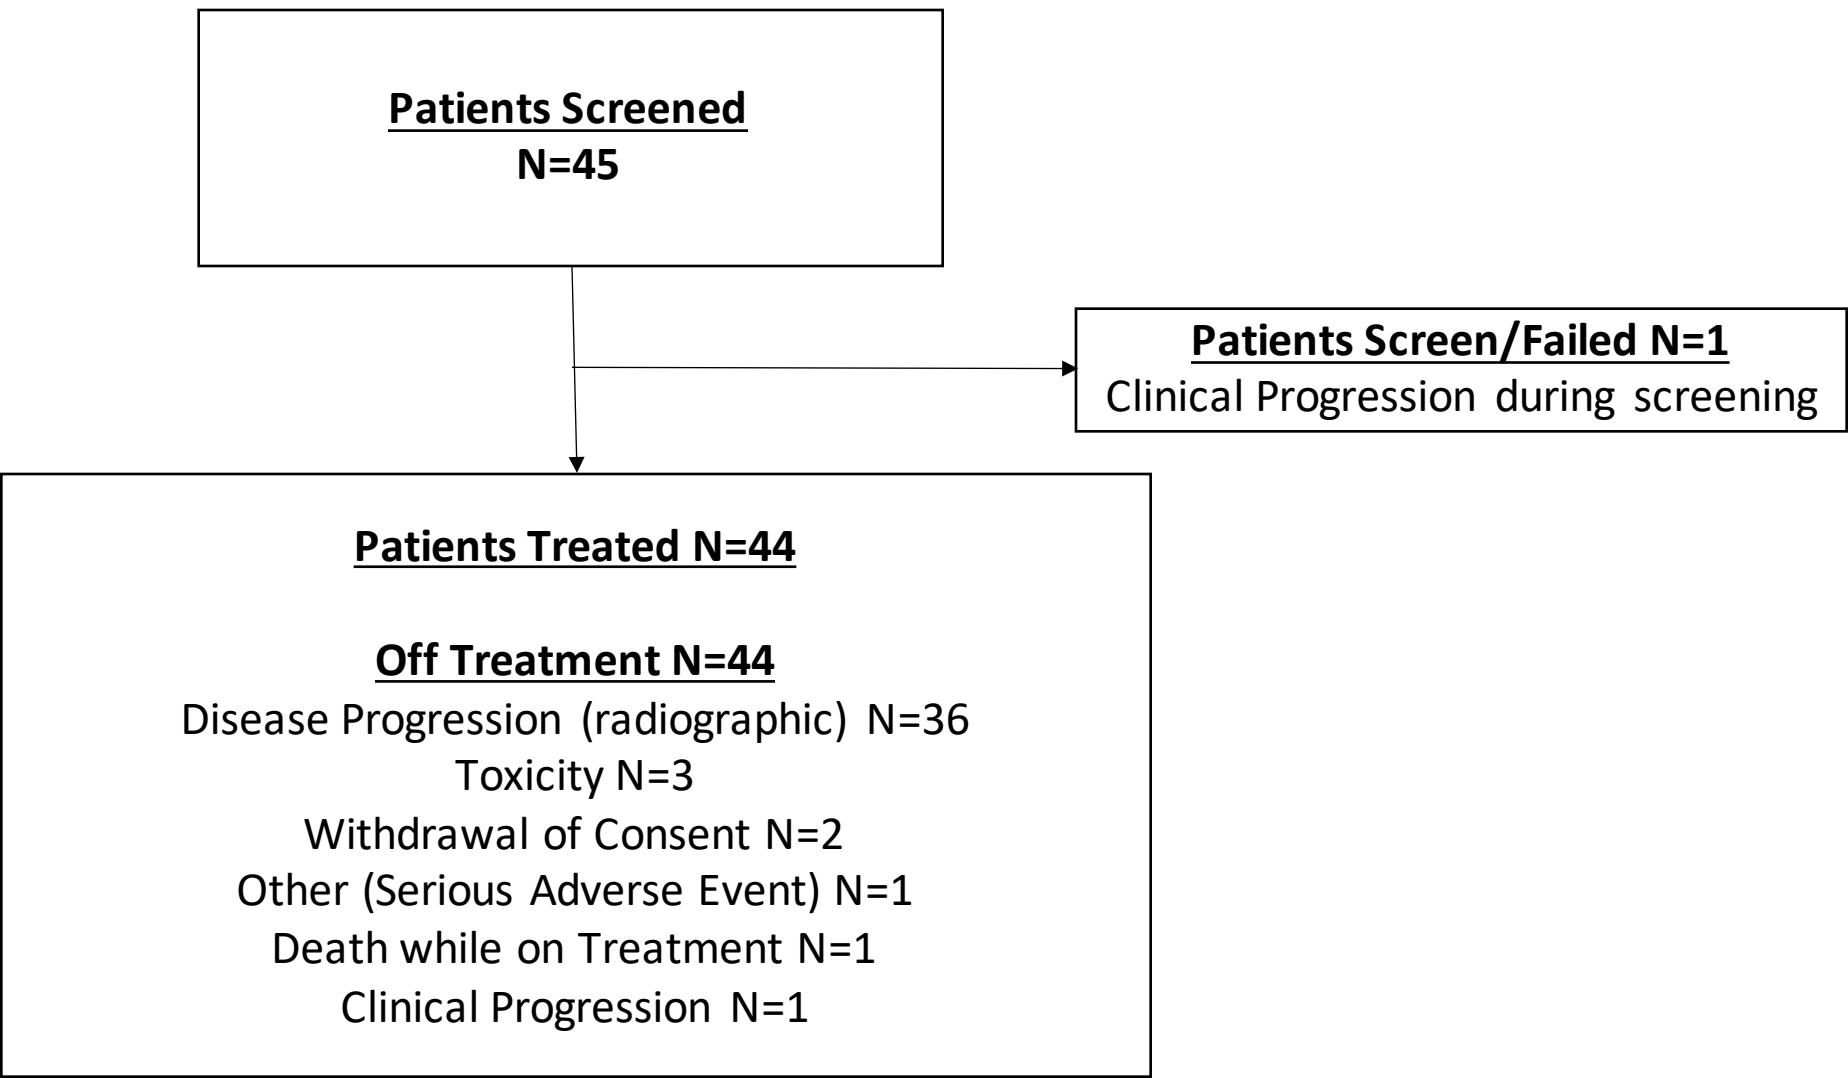

Supplement: NIHMS1893235-supplement-Supplementary_Figure_1.pdf [file NIHMS1893235-supplement-Supplementary_Figure_1.pdf]

# Supplementary Figure 2

## Relative Change in CEA

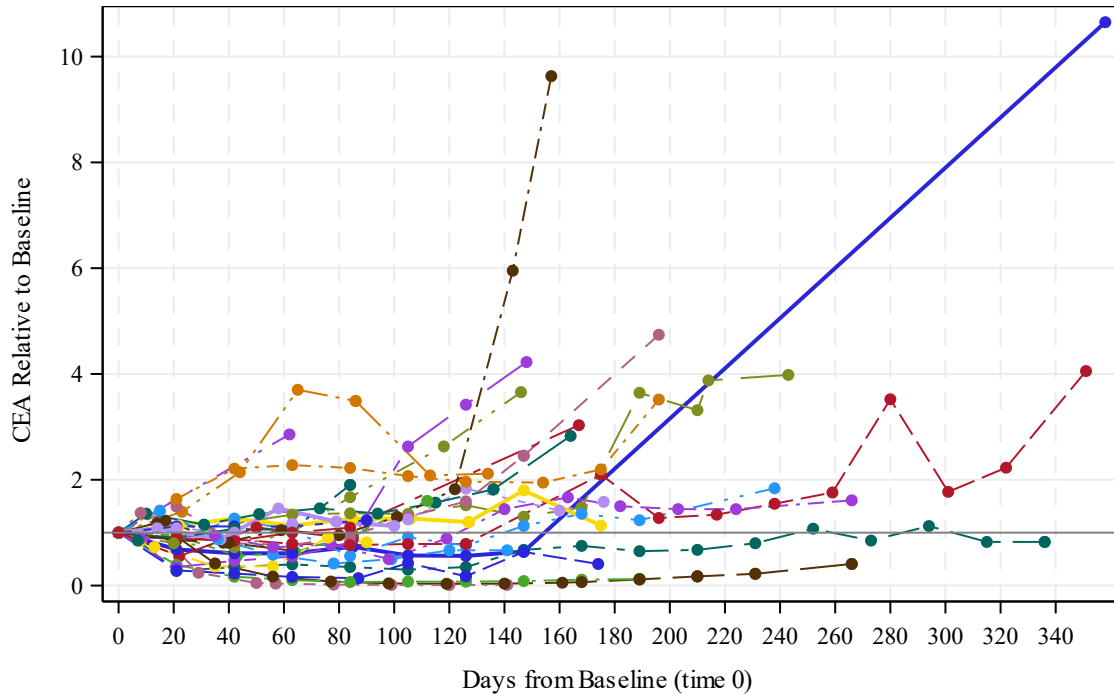

Supplement: NIHMS1893235-supplement-Supplementary_Figure_2.pdf [file NIHMS1893235-supplement-Supplementary_Figure_2.pdf]

# Supplementary Figure 3

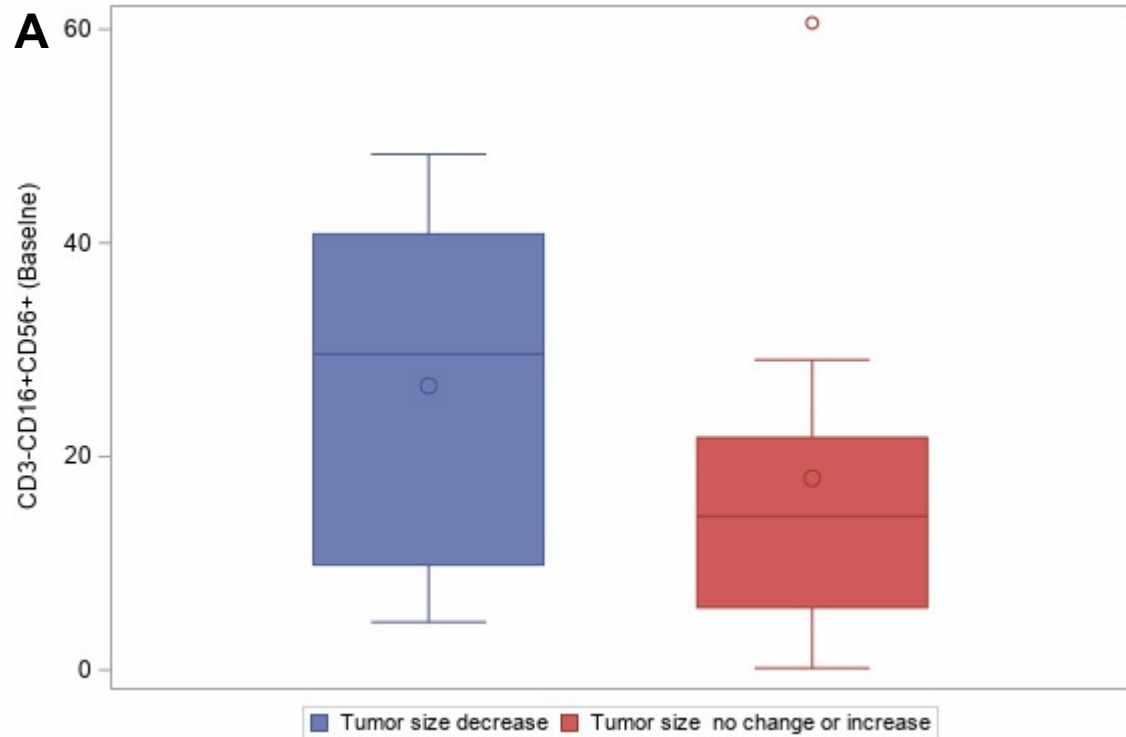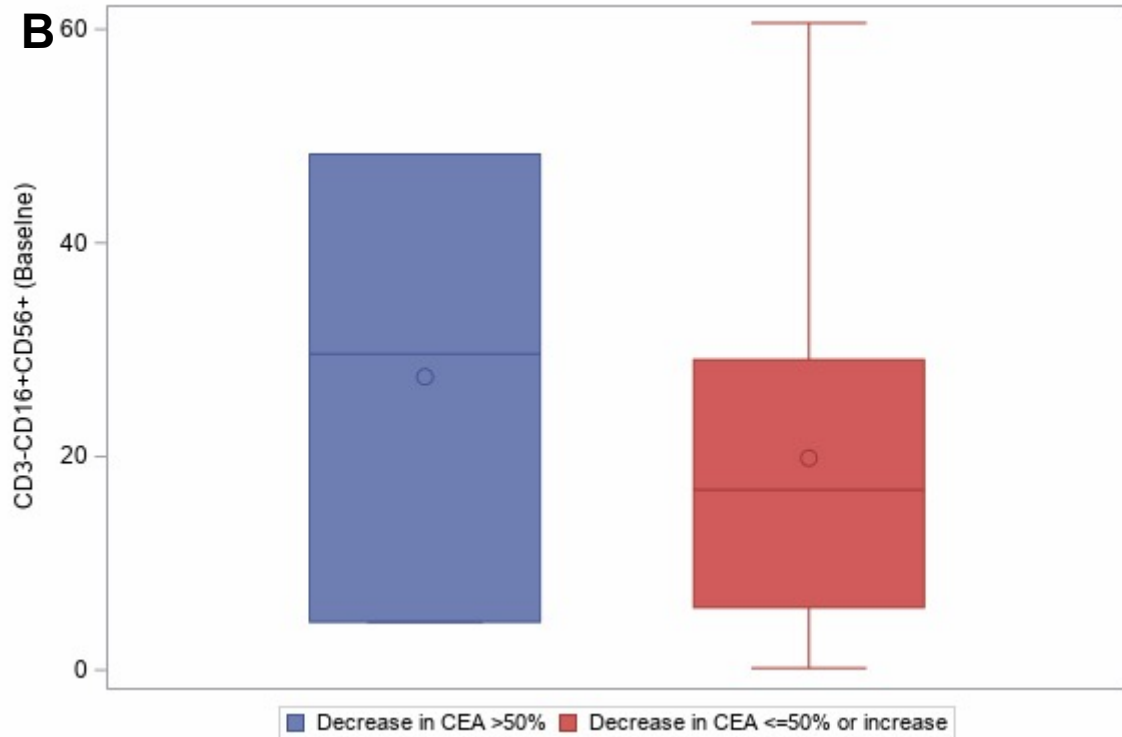

Supplement: NIHMS1893235-supplement-Supplementary_Figure_3.pdf [file NIHMS1893235-supplement-Supplementary_Figure_3.pdf]

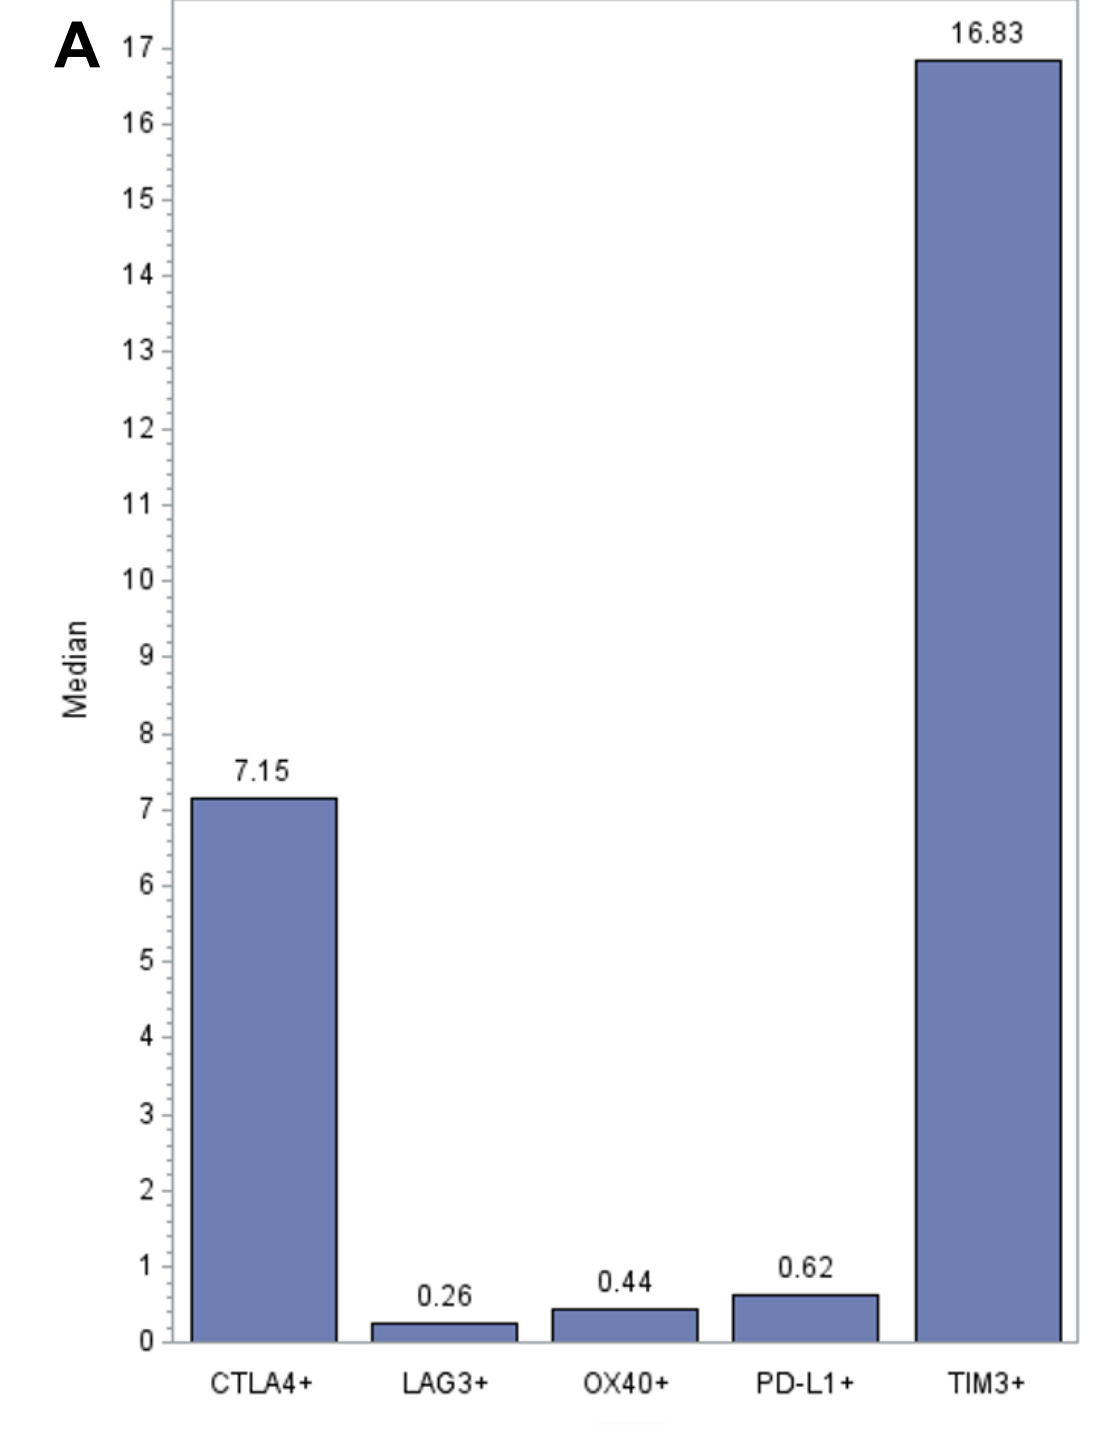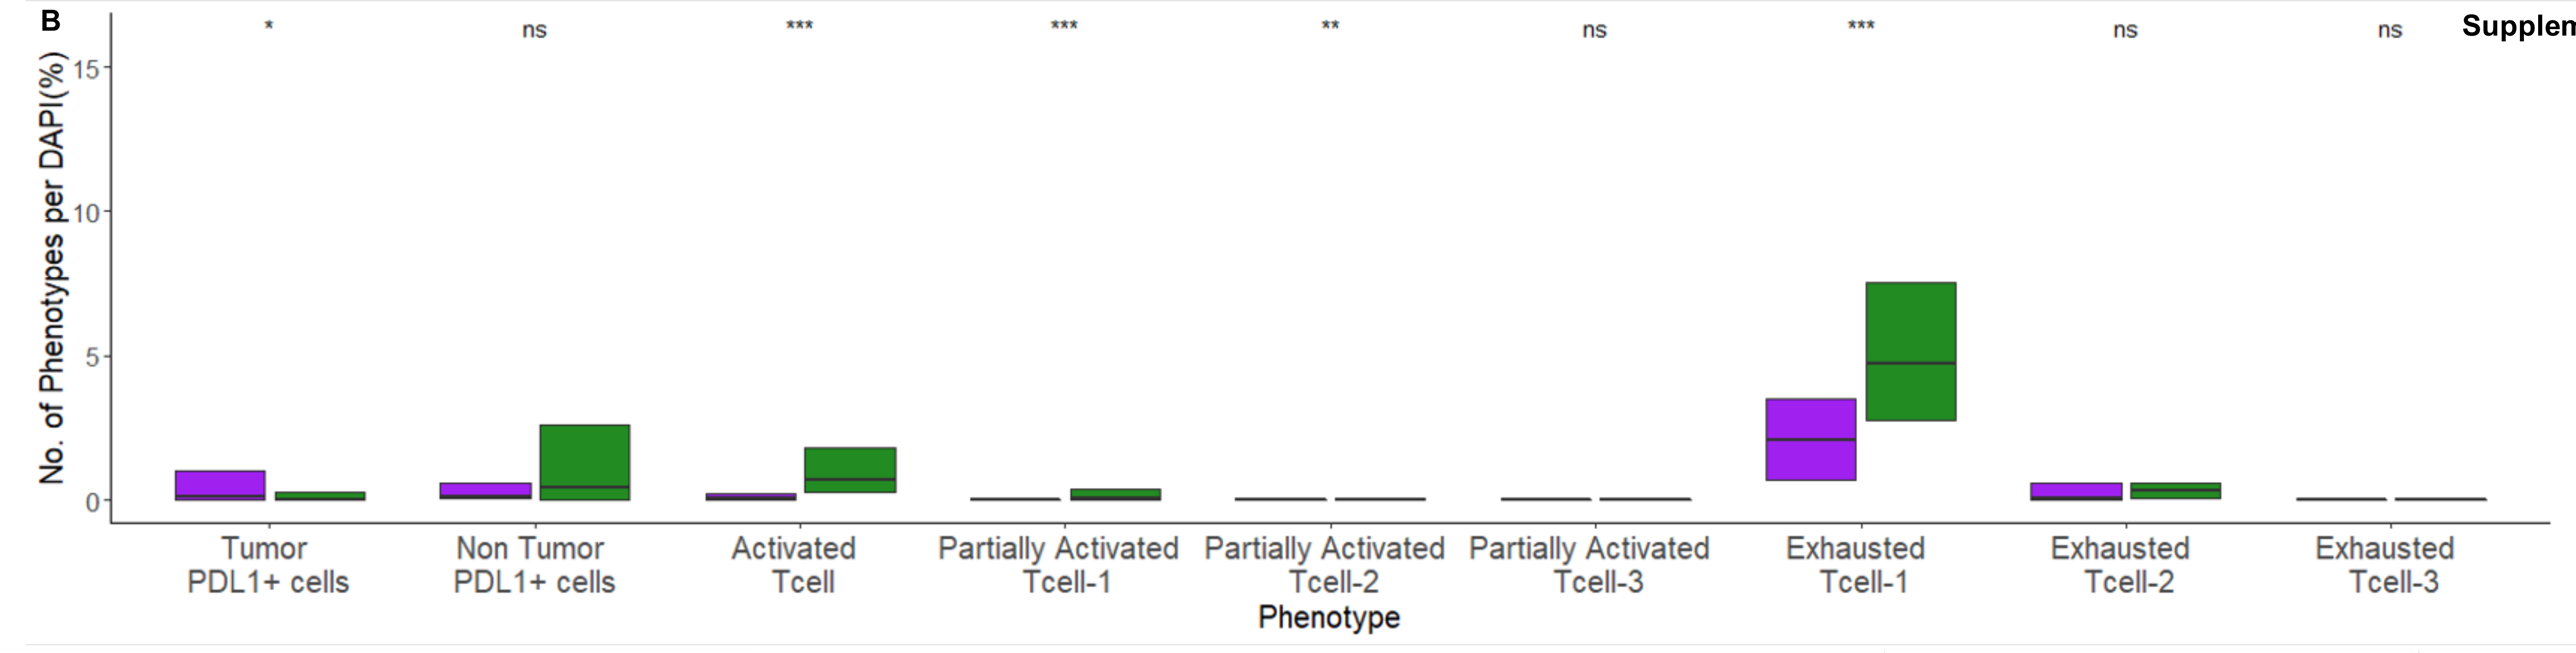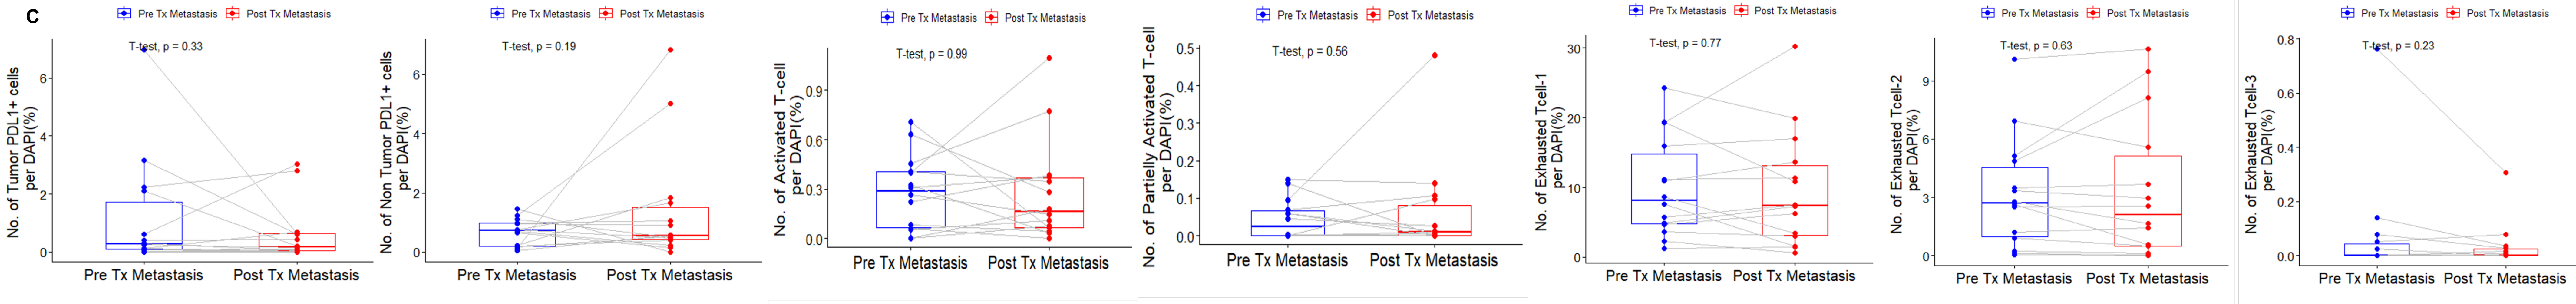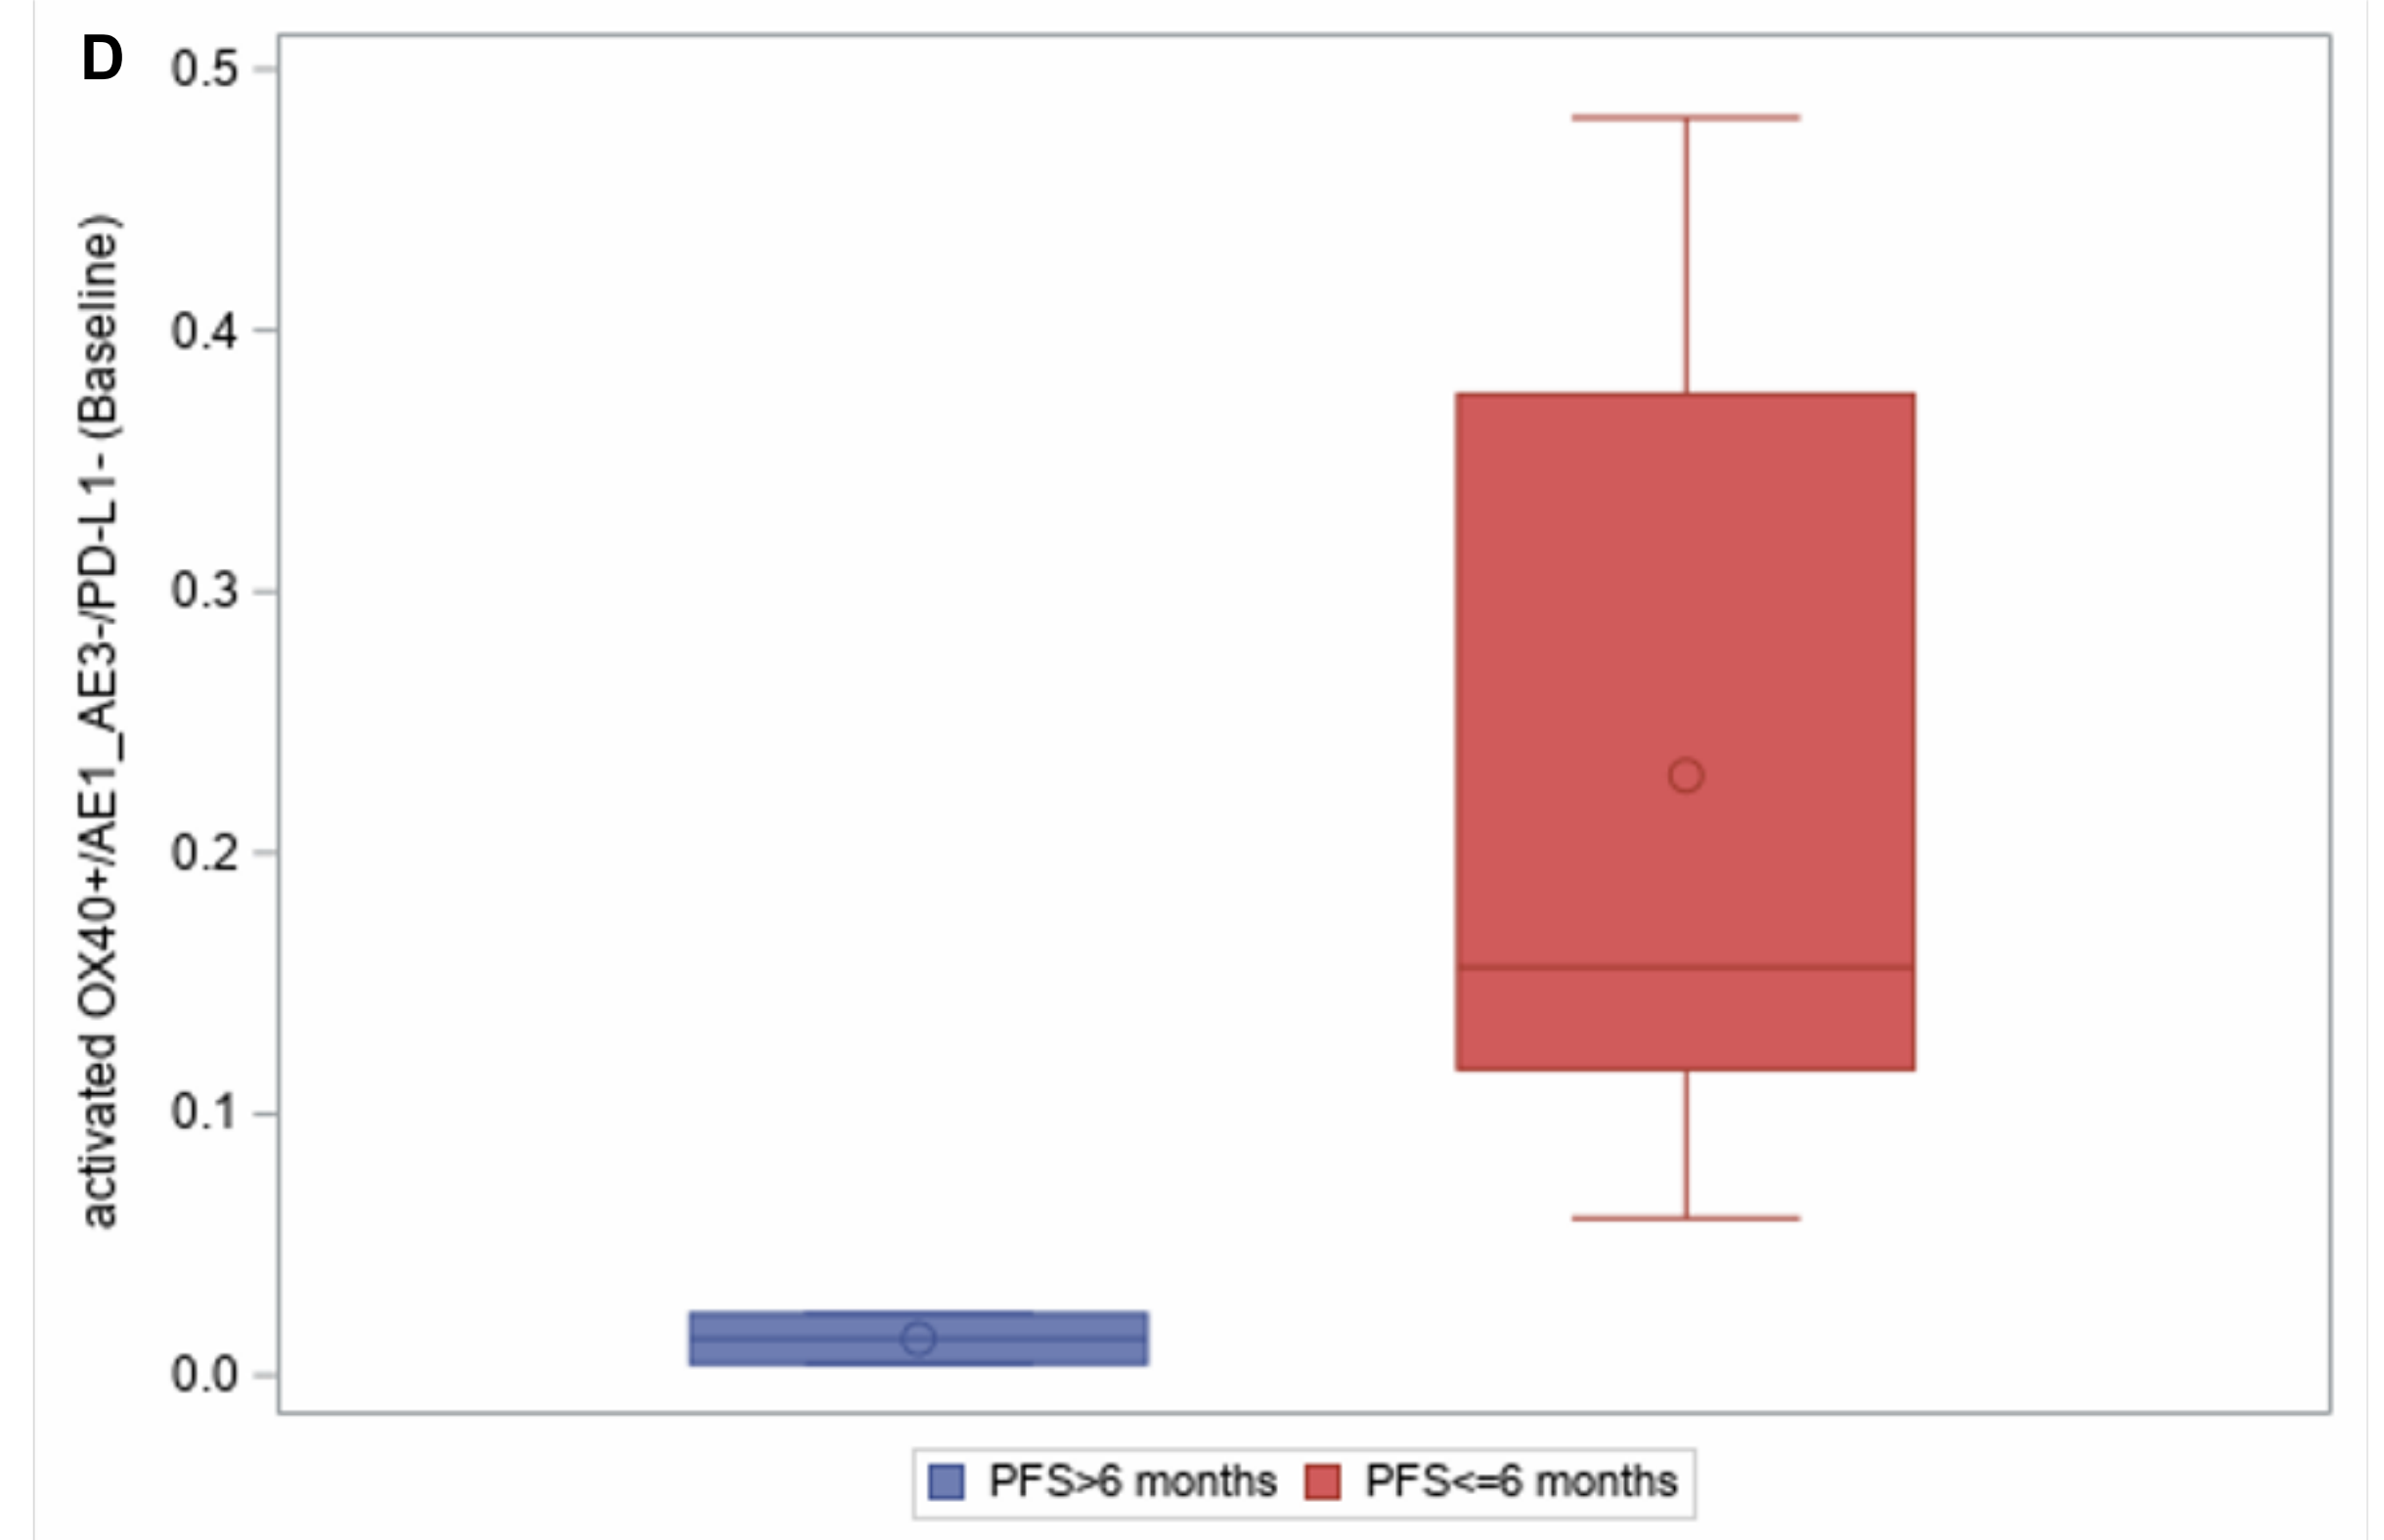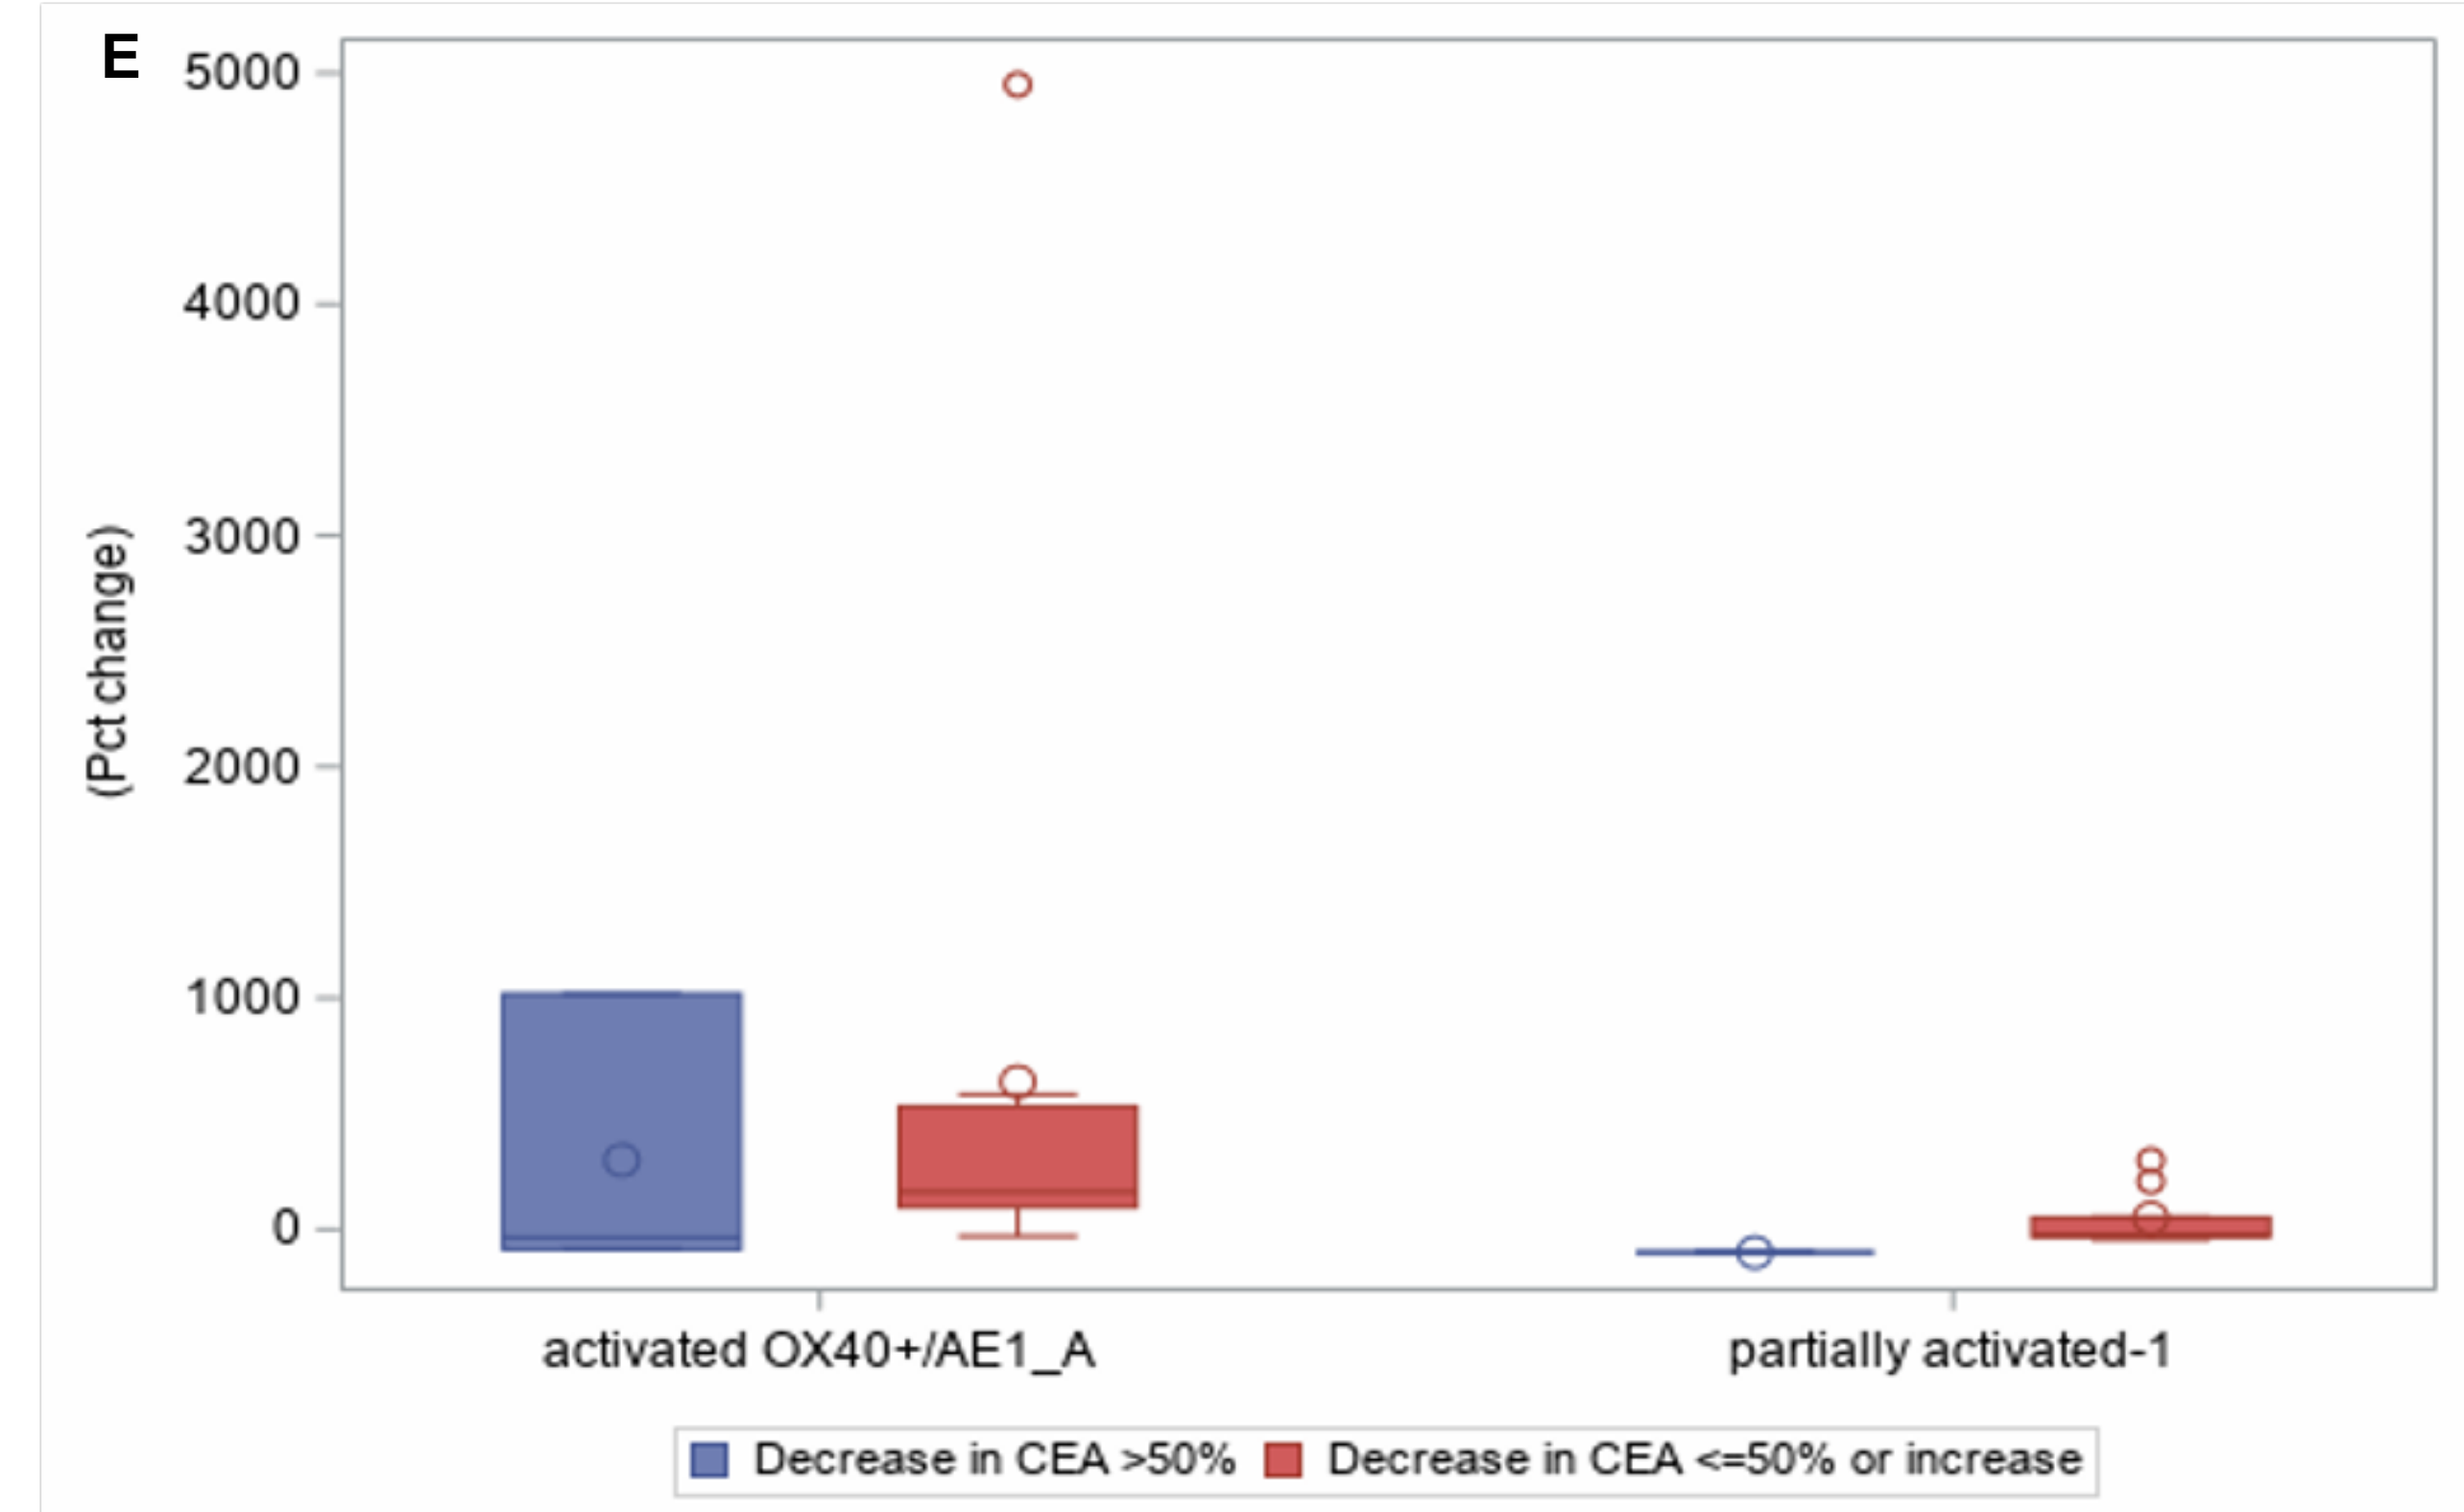

Supplement: NIHMS1893235-supplement-Supplementary_Figure_4.pdf [file NIHMS1893235-supplement-Supplementary_Figure_4.pdf]

# Supplementary Figure 5

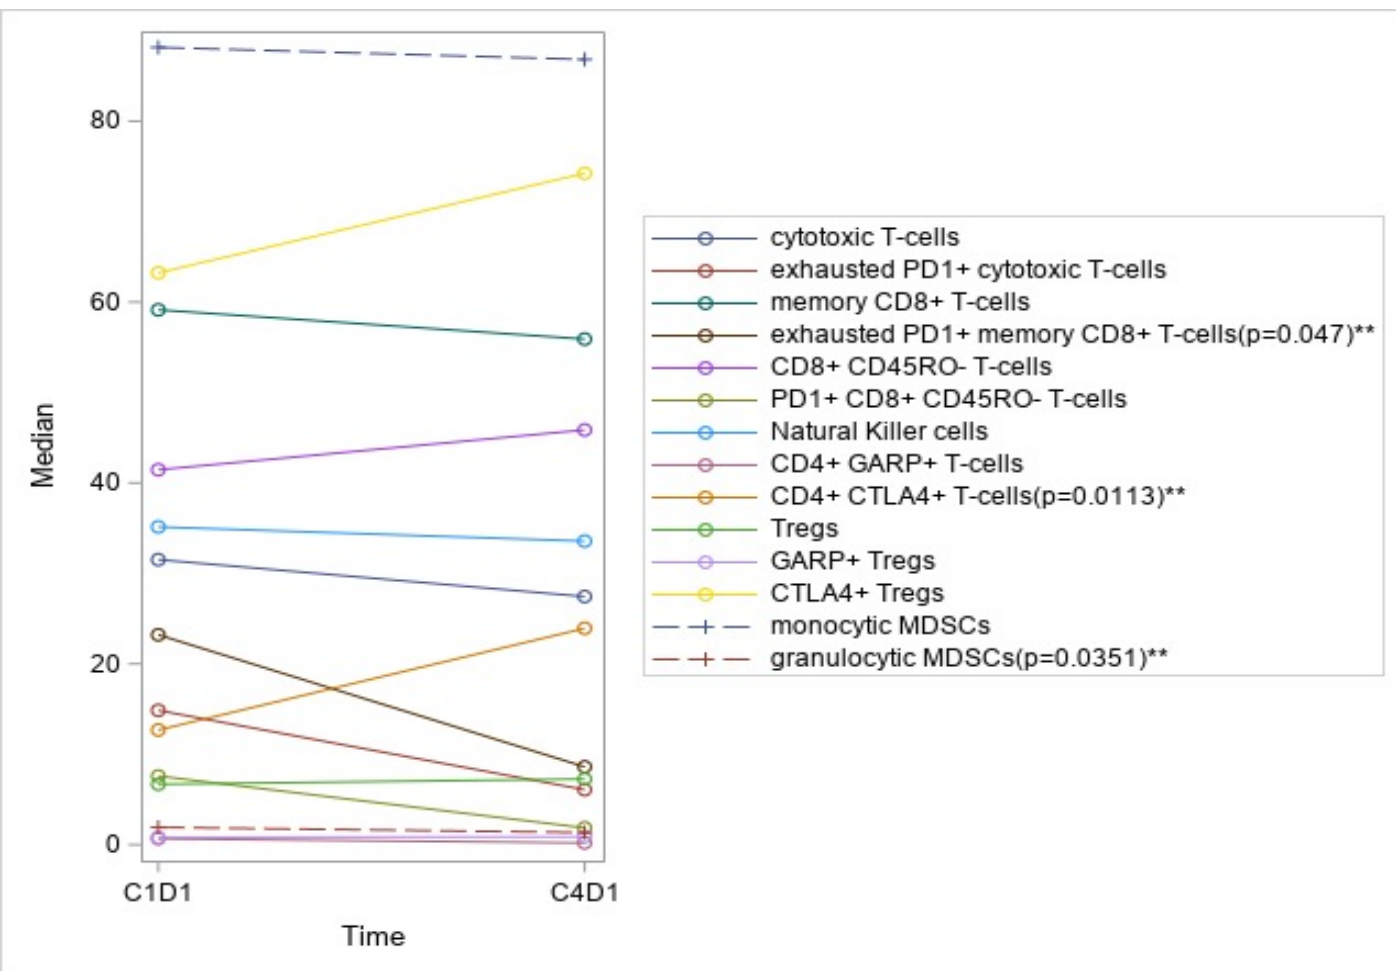

Supplement: NIHMS1893235-supplement-Supplementary_Figure_5.pdf [file NIHMS1893235-supplement-Supplementary_Figure_5.pdf]
